# Modelling, Simulations and Analysis of the First and Second COVID-19 Epidemics in Beijing

Lequan Min  
School of Mathematics and Physics  
University of Science and Technology Beijing, Beijing, 100083, PR China  
E-mail: 13501029489@163.com

## Abstract

Modeling and simulation are important tools that can be used to control, prevent and understand an epidemic spread. This paper introduces a symptomatic-asymptomatic-recoverer-death differential equation model (SARDDE). It presents the conditions of the asymptotical stability on the disease-free equilibrium of the SARDDE. It proposes the necessary conditions of disease spreading for the SARDDE. Based on the reported data of the first and the second COVID-19 epidemics in Beijing and simulations, it determines the parameters of the SARDDE, respectively. Numerical simulations of the SARDDE describe well the outcomes of current symptomatic and asymptomatic individuals, recovered symptomatic and asymptomatic individuals, and died individuals, respectively. The numerical simulations suggest that both symptomatic and asymptomatic individuals cause lesser asymptomatic spread than symptomatic spread; the blocking rates of about 90% and 97% to the symptomatic individuals cannot prevent the spread of the first and second COVID19 epidemics in Beijing, respectively. Virtual simulations suggest that the strict prevention and control strategies implemented by Beijing government are effective and necessary. The numerical simulations suggest also that using the data from the beginning to the days after about two weeks from the turning points can estimate approximately the following outcomes of the two COVID-19 academics, respectively. A recommendation to avoid multiple epidemic outbreaks is proposed. It is expected that the research can provide better understanding, explaining, and dominating for epidemic spreads, prevention and control measures.

**Key Words:** Mathematical model, COVID-19, Epidemic, Numerical simulation, Parameter estimation, Long-term's prediction.

## Contents

|          |                                                        |          |
|----------|--------------------------------------------------------|----------|
| <b>1</b> | <b>Introduction</b>                                    | <b>2</b> |
| <b>2</b> | <b>SARDDEs and Dynamic Properties</b>                  | <b>3</b> |
| 2.1      | Data collection . . . . .                              | 3        |
| 2.2      | SARDDE with death variable . . . . .                   | 3        |
| 2.2.1    | Model . . . . .                                        | 3        |
| 2.2.2    | Stability of disease-free equilibrium . . . . .        | 4        |
| 2.2.3    | The necessary condition of disease spreading . . . . . | 4        |
| 2.3      | SARDDE Model without death variable . . . . .          | 5        |
| 2.3.1    | Model . . . . .                                        | 5        |
| 2.3.2    | Stability of disease-free equilibrium . . . . .        | 6        |
| 2.3.3    | The necessary condition of disease spreading . . . . . | 6        |

|                                                                                    |           |
|------------------------------------------------------------------------------------|-----------|
| <b>3 Applications</b>                                                              | <b>7</b>  |
| 3.1 Simulation and prediction of the first COVID-19 epidemic in Beijing . . . . .  | 7         |
| 3.1.1 Modeling and Simulation . . . . .                                            | 7         |
| 3.1.2 Discussions . . . . .                                                        | 10        |
| 3.1.3 Virtual Simulations . . . . .                                                | 12        |
| 3.2 Simulation and prediction of the second COVID-19 epidemic in Beijing . . . . . | 13        |
| 3.2.1 Modeling and Simulation . . . . .                                            | 13        |
| 3.2.2 Discussions . . . . .                                                        | 17        |
| 3.2.3 Virtual Simulation . . . . .                                                 | 18        |
| <b>4 Conclusions</b>                                                               | <b>18</b> |
| <b>References</b>                                                                  | <b>22</b> |

## 1 Introduction

In December 2019, a novel coronavirus-induced pneumonia (COVID-19) broke out in Wuhan, China. Globally by 8 September 2021 there have been about 22.1 million confirmed cases of COVID-19, including 4.5 million deaths, reported to WHO (see <https://covid19.who.int/>). Now COVID-19 affects more than 220 countries and regions including Antarctica.

One of the reasons of such a tragedy is that people in some countries do not pay attentions to theoretical analysis and estimations for COVID-19 epidemics. In fact mathematical models for epidemic infectious diseases have played important roles in the formulation, evaluation, and prevention of control strategies. Modelling the dynamics of spread of disease can help people to understand the mechanism of epidemic diseases, formulate and evaluate prevention and control strategies, and predict tools for the spread or disappearance of an epidemic [1].

Since the outbreak of COVID-19 in Wuhan, many scholars have published a large numbers of articles on the modeling and prediction of COVID-19 epidemic (for examples see [2–11]). It is difficult to describe well the dynamics of COVID-19 epidemics. In a Lloyd-Smith et al’s paper, it described nine challenges in modelling the emergence of novel pathogens, emphasizing the interface between models and data [12].

On 19 January, two Beijingers returning from Wuhan were diagnosed with COVID-19. That triggered the first wave of COVID-19 in Beijing. During the first wave of COVID-19, a total of 420 locally diagnosed cases were reported. After 140 days , on 8 June, 411 COVID-19 infected individuals were cured and 9 died [13]. However three days later, there was one new confirmed individual infected a kind of different COVID-19 in an agricultural products wholesale market in Tongzhou district, Beijing. This triggered a second wave of COVID-19 epidemic in Beijing. After 56 days, totals of 335 and 50 locally symptomatic and asymptomatic COVID-19 individuals were reported, and all individuals were cured. Medical staff have achieved zero infection [13].

This paper introduces a SARDDE. It gives the conditions of the asymptotical stability on the disease-free equilibrium of the SARDDE. Using simulations determines the parameters of the SARDDE based on the reported data of the two COVID-19 epidemics in Beijing [13]. Numerical simulations of the SARDDE describe well the practical outcomes of current infected symptomatic and asymptomatic individuals, recovered infected symptomatic and asymptomatic individuals, and died infected individuals. Virtual simulations are given to estimate the effectiveness of the prevention and control strategies.

The rest of this article is organized as follows. Sections 2.1 and 2.4 establish the SARDDEs with 5 and 4 variables. Sections 2.2 and 2.5 provide the criterions of the asymptotical stability of the disease-free equilibriums of the two SARDDEs. Sections 2.3 and 2.6 determine the necessary conditions of disease spreading. Sections 3.1 and 3.4 implement the dynamic simulations of the SARDDEs to describe the reported data of the first

and second COVID-19 epidemic in Beijing, respectively. Sections 3.2 and 3.5 discuss and analyze the simulation results. Sections 3.3 and 3.6 implement two virtual simulation examples to predict the outcomes of the two Beijing epidemics on different prevention and control measures. Section 4 concludes the paper. A recommendation to avoid multiple epidemic outbreaks is proposed in the same Section.

## 2 SARDDEs and Dynamic Properties

### 2.1 Data collection

The original COVID-19 data sets of the first and second epidemics in Beijing were downloaded from the Beijing authority's Web [13]. The author edited the original COVID-19 data sets for using in this study.

### 2.2 SARDDE with death variable

#### 2.2.1 Model

For SARDDE model with death variable, there are five states.  $I(t)$ ,  $I_a(t)$ ,  $I_r(t)$ ,  $I_{ra}(t)$  and  $D(t)$  represent the fraction of current symptomatic infected individuals, and current asymptomatic infected individuals, cumulative recovered symptomatic infected individuals, cumulative recovered asymptomatic infected individuals and cumulative died individuals, respectively. The transition among these states is governed by the following rules (Flowchart of the rules is shown in Fig.1, where  $S$  represents susceptible population.).

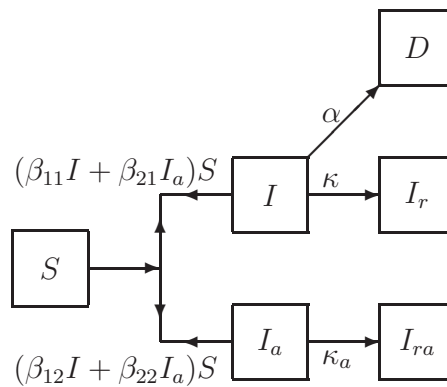

**Figure 1** Flowchart of disease transmission among susceptible population  $S$ , current symptomatic infected individuals  $I$ , current infected individuals  $I_a$ , recovered symptomatic infected individuals  $I_r$ , recovered asymptomatic but infected individuals  $I_{ra}$ , and died individuals  $D$ .

First, the symptomatic infected individuals ( $I$ ) and the asymptomatic infected individuals ( $I_a$ ) infect the susceptible population ( $S$ ) with the transmission rates of  $\beta_{11}$  and  $\beta_{21}$ , respectively, making  $S$  become symptomatic infected individuals, and with the transmission rates of  $\beta_{12}$  and  $\beta_{22}$ , respectively, making  $S$

become asymptomatic individuals. Then, a symptomatic individual is cured at a rate  $\kappa$ , an asymptomatic individual returns to normal at a rate  $\kappa_a$ . An infected individual dies at a rate  $\alpha$ . Here all parameters are positive numbers. Assume that the dynamics of an epidemic can be described by  $m$ -time intervals, which correspond different prevention and control measures, and medical effects. At  $i$ th time interval, the SARDDE has the form:

$$\frac{dI}{dt} = \theta_1(i)(\beta_{11}I + \beta_{21}I_a)S - \kappa(i)I - \alpha(i)I \quad (1a)$$

$$\frac{dI_a}{dt} = \theta_2(i)(\beta_{12}I + \beta_{22}I_a)S - \kappa_a(i)I_a \quad (1b)$$

$$\frac{dI_r}{dt} = \kappa(i)I \quad (1c)$$

$$\frac{dI_{ra}}{dt} = \kappa_a(i)I_a \quad (1d)$$

$$\frac{dD}{dt} = \alpha(i)I \quad (1e)$$

where  $(1 - \theta_1(i))$  and  $(1 - \theta_2(i))$  ( $i = 1, \dots, m$ ) represent the blocking rates to symptomatic and asymptomatic infections, respectively. Then SARDDE (1) has a disease-free equilibrium:

$$E = (0, 0, 0, 0, 0). \quad (2)$$

### 2.2.2 Stability of disease-free equilibrium

The stability of SARDDE (1) is determined by the first two equations (1a) and (1b). Denote in (1a) and (1b)

$$a_{11} = \theta_1(i)\beta_{11}S - \kappa(i) - \alpha(i) \quad (3)$$

$$, \quad a_{12} = \theta_1(i)\beta_{21}S, \quad (4)$$

$$a_{21} = \theta_2(i)\beta_{12}S, \quad (5)$$

$$a_{22} = \theta_2(i)\beta_{22}S - \kappa_a(i). \quad (6)$$

Then at the disease-free equilibrium of SARDDE (1), the Jacobian matrix of (1a) and (1b) is

$$J = \begin{bmatrix} a_{11} & a_{12} \\ a_{21} & a_{22} \end{bmatrix}.$$

Solving the corresponding eigenequation obtains two eigenvalues:

$$x_{1,2} = \frac{1}{2} \left( a_{11} + a_{22} \pm \sqrt{(a_{11} + a_{22})^2 - 4(a_{11}a_{22} - a_{12}a_{21})} \right)$$

Therefore we obtain the following:

**Theorem 1** Suppose that  $a_{11}, a_{12}, a_{21}$  and  $a_{22}$  are defined by (3)-(6). Then the disease-free equilibrium  $E$  (2) of SARDDE (1) is globally asymptotically stable if, and only if, the following inequalities hold:

$$(a) \quad R_{local}^1 \triangleq a_{11} + a_{22} < 0, \quad (7)$$

$$(b) \quad R_{local}^2 \triangleq a_{12}a_{21} - a_{11}a_{22} < 0. \quad (8)$$

### 2.2.3 The necessary condition of disease spreading

If an epidemic can occur, then

$$\dot{I}(t)|_{t=0} > 0, \quad \dot{I}_a(t)|_{t=0} > 0.$$

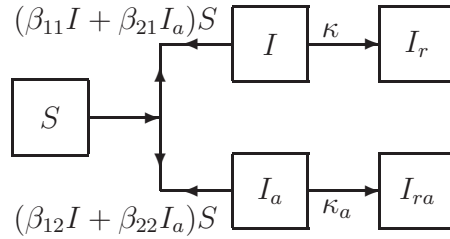

**Figure 2** Flowchart of disease transmission among susceptible population  $S$ , current symptomatic infected individuals  $I$ , current asymptomatic infected individuals  $I_a$ , recovered symptomatic infected individuals  $I_r$ , recovered asymptomatic infected individuals  $I_{ra}$ .

This implies that

$$\begin{aligned}\theta_1(i)(\beta_{11} + \beta_{21}I_a(t)/I(t))S - \alpha(i) - \kappa(i) &> 0 \\ \theta_2(i)(\beta_{12}I(t)/I_a(t) + \beta_{22})S - \kappa_a(i) &> 0.\end{aligned}$$

Solving the above inequalities gives the following

**Theorem 2** If SARDDE (1) satisfies the following inequalities

$$(a) \quad S_p^1 \triangleq \theta_1(i)(\beta_{11} + \beta_{21}I_a(t)/I(t))S/(\alpha(i) + \kappa(i)) > 1 \quad (9)$$

$$(b) \quad S_p^2 \triangleq \theta_2(i)(\beta_{12}I(t)/I_a(t) + \beta_{22})S/\kappa_a(i) > 1, \quad (10)$$

then a disease transmission will occur.

## 2.3 SARDDE Model without death variable

### 2.3.1 Model

Similar to Section 2.2.1, the transition among these states is governed by the following rules (Flowchart of the rules is shown in Fig. 2, where  $S$  represents susceptible population.)

Assume that the dynamics of an epidemic can be described by  $m$  time intervals. At  $i$ th time interval, SARDDE (1) becomes the form:

$$\frac{dI}{dt} = \theta_1(i)(\beta_{11}I + \beta_{21}I_a)S - \kappa(i)I \quad (11a)$$

$$\frac{dI_a}{dt} = \theta_2(i)(\beta_{12}I + \beta_{22}I_a)S - \kappa_a(i)I_a \quad (11b)$$

$$\frac{dI_r}{dt} = \kappa(i)I \quad (11c)$$

$$\frac{dI_{ra}}{dt} = \kappa_a(i)I_a \quad (11d)$$

Then SARDDE (11) has a disease-free equilibrium:

$$E = (0, 0, 0, 0). \quad (12)$$

### 2.3.2 Stability of disease-free equilibrium

The stability of SARDDE (11) is determined by the first two equations (11a) and (11b). Denote in (11a) and (11b):

$$a_{11} = \theta_1(i)\beta_{11}S - \kappa(i), \tag{13}$$

$$, \quad a_{12} = \theta_1(i)\beta_{21}S, \tag{14}$$

$$a_{21} = \theta_2(i)\beta_{12}S, \tag{15}$$

$$a_{22} = \theta_2(i)\beta_{22}S - \kappa_a(i). \tag{16}$$

Then at the disease-free equilibrium of SARDDE(11), the Jacobian matrix of (11a) and (11b) has the form

$$J = \begin{bmatrix} a_{11} & a_{12} \\ a_{21} & a_{22} \end{bmatrix}.$$

Solving the corresponding eigenequation obtains 2 eigenvalues:

$$x_{1,2} = \frac{1}{2} \left( a_{11} + a_{22} \pm \sqrt{(a_{11} + a_{22})^2 + 4(a_{12}a_{21} - a_{11}a_{22})} \right).$$

Therefore we obtain the following:

**Theorem 3** Suppose that  $a_{11}, a_{12}, a_{21}$  and  $a_{22}$  are defined by (13)-(16). Then the disease-free equilibrium  $E$  of SARDDE (11) is globally asymptotically stable if, and only if, the following inequalities hold:

$$(a) \quad R_{local}^1 \triangleq a_{11} + a_{22} < 0, \tag{17}$$

$$(b) \quad R_{local}^2 \triangleq a_{12}a_{21} - a_{11}a_{22} < 0. \tag{18}$$

### 2.3.3 The necessary condition of disease spreading

If an epidemic can occur, then

$$\dot{I}(t)|_{t=0} > 0, \quad \dot{I}_a(t)|_{t=0} > 0.$$

This implies that

$$\begin{aligned} \theta_1(i)(\beta_{11} + \beta_{21}I_a(t)/I(t))S - \kappa(i) &> 0 \\ \theta_2(i)(\beta_{12}I(t)/I_a(t) + \beta_{22})S - \kappa_a(i) &> 0. \end{aligned}$$

Solving the above inequalities gives the following

**Theorem 4** If SARDDE (11) satisfies the following inequalities

$$(a) \quad S_p^1 \triangleq \theta_1(i)(\beta_{11} + \beta_{21}I_a(t)/I(t))S/\kappa(i) > 1 \tag{19}$$

$$(b) \quad S_p^2 \triangleq \theta_2(i)(\beta_{12}I(t)/I_a(t) + \beta_{22})S/\kappa_a(i) > 1, \tag{20}$$

Then a disease transmission will occur.

### 3 Applications

#### 3.1 Simulation and prediction of the first COVID-19 epidemic in Beijing

This Section will discuss the applications of Theorem 1, Theorem 2 and SARDDE (1) to simulate the real-world COVID-19 epidemic data from 19 January to 8 June 2020 in Beijing [13]. Numerical simulations and drawings are performed by using MATLAB software programs.

##### 3.1.1 Modeling and Simulation

Figures 3(a) and 3(b) show the first 55 days' reported clinical data on the current confirmed infection cases, and the reported clinical data on recovered cases of the COVID-19 epidemic in Beijing [13]<sup>1</sup>. The number of the current symptomatic infected individuals is shown in Fig4(a) by circles. The numbers of the cumulative recovered symptomatic infected individuals, and the cumulative died infected individuals are shown in Fig4(b) by circles and stars respectively.

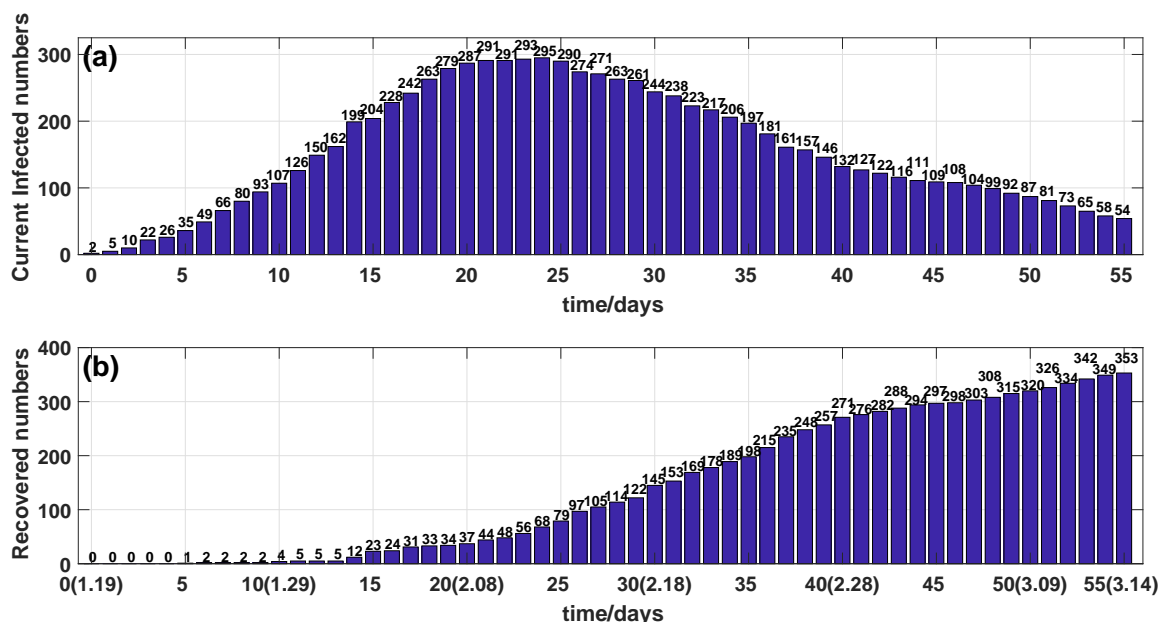

Figure 3 (a) Outcome of the number of the current infected individuals. (b) Outcome of the number of the cumulative recovered individuals.

The number of the current infected individuals was risen rapidly in the first 4 days (see Fig.3(a) and Fig. 4(a)). The number of the current infected individuals reached the highest 295 on day 24, February 12. Then after day 31, February 19, they declined rapidly (see Fig.3(a) and 4(a)).

Observe from Figs. 4(a) and 4(b) that the overall changes in the number of the current confirmed infections are not subject to the law of exponential changes, but the data can be approximated in good agreement with 8 straight lines in log scale (see Fig. 4). This phenomenon can be explained as different medical measures prevention and control strategies have been adopted over the different 8-time intervals. On day 86, 15 April, there were 3 Chaoyang district infected people coming back Beijing form foreign country which made calculated blocking rate

<sup>1</sup>In the cases that some reported data crossed one day, we assign approximately the numbers according to the ratios of time intervals.

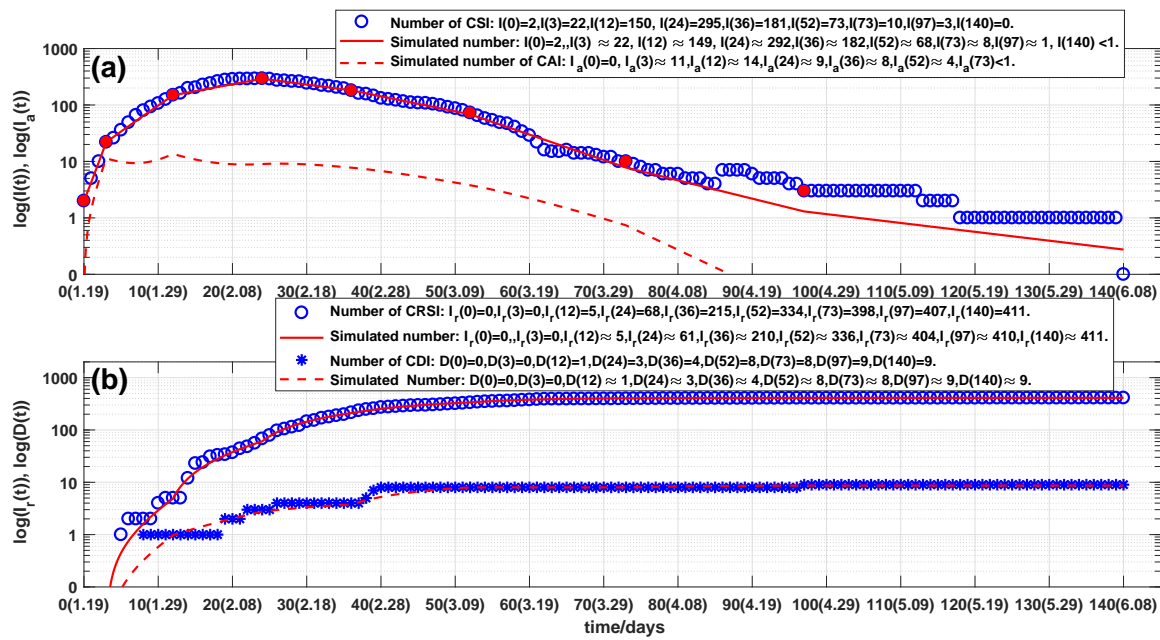

Figure 4 (a) Outcome of the number of the current symptomatic individuals (CSI), representing by circles. Solid lines and dash lines are outcomes of the corresponding simulations of SARDDE (1). (b) Outcomes of the numbers of the cumulative recovered symptomatic individuals (CRSI) and the cumulative died individuals (CDI), representing by circles and stars, respectively. Solid lines and dash lines are the corresponding simulations of SARDDE (1).

to rise. Therefore the  $i$  in SARDDE model (1) should be chosen as  $i = 1, 2, \dots, 8$ .

First it needs to determine the parameters  $\kappa(i), \kappa_a(i)$  and  $\alpha(i)$ . There are different methods for calculating the recovery rate  $\kappa(i)$  in a specific time interval. It seems to be reasonable that we represent  $\kappa(i)$  via using the number of the recovered patients to divide the days of patients stayed in the hospital during the  $i$ th time interval.

Denote  $s_1(i)$  and  $s_2(i)$  to be the days that the old patients and the new patients stayed in the hospital during  $i$ th time interval. Denote  $R(i)$  and  $d(i)$  to be the numbers of the recovered patients and died patients during  $i$ th time interval. Then we have

$$\kappa(i) = \frac{R(i)}{s_1(i) + s_2(i)} \quad (21)$$

$$\alpha(i) = \frac{d(i)}{s_1(i) + s_2(i)}. \quad (22)$$

Denote  $t_i$  and  $t_{i+1}$  to be the first date and the last date in the  $i$ th time interval. Denote  $I_1(t_i)$  = the number of the current symptomatic infected individuals on day  $t_i$ ,  $I_2(t_i)$  = the number of the daily recovered symptomatic infected individuals,  $I_3(t_i)$  = the number of the daily died infected individuals,



$I_4(t_i)$  = the number of the daily increased symptomatic infected individuals. Then we obtain

$$s_1(i) = (I_1(t_i) - \sum_{j=1}^{t_{i+1}-t_i} (I_2(t_i+j) + I_3(t_i+j)))(t_{i+1} - t_i) + [1, 2, \dots, t_{i+1} - t_i] \times [I_2(t_i+1) + I_3(t_i+1), I_2(t_i+2) + I_3(t_i+2), \dots, I_2(t_{i+1}) + I_3(t_{i+1})]^T, \quad (23)$$

$$s_2(i) = [t_{i+1} - t_i, t_{i+1} - t_i - 1, \dots, 1] \times [I_4(t_i), I_4(t_i+1), \dots, I_4(t_{i+1})]^T, \quad (24)$$

$$R(i) = \sum_{j=0}^{t_{i+1}-t_i} I_2(t_i+j), \quad (25)$$

$$d(i) = \sum_{j=0}^{t_{i+1}-t_i} I_3(t_i+j). \quad (26)$$

Since there is no information on recovered asymptomatic infected individuals, we take

$$\kappa_a(i) = \frac{1}{7}. \quad (27)$$

That is, an asymptomatic infected individual will recover average seven days. The calculated  $\kappa(i)$ 's and  $\alpha(i)$ 's are shown in the 7 ~ 8 columns in Table 1.

**Table 1** The data of the first COVID-19 epidemic in Beijing on different days and corresponding calculated SARDDE parameters. Where NCSII and NCDI represent the numbers [13] of the current symptomatic infected individuals and the current died individuals, respectively; NRSII the number [13] of the recovered symptomatic infected individuals.

| $i$      | Day | Date | NCSII | NRSII | NCDI | $\kappa(i)$ | $\alpha(i)$ | $\theta_1(i)$ | $\theta_2(i)$ |
|----------|-----|------|-------|-------|------|-------------|-------------|---------------|---------------|
| <b>1</b> | 0   | 1.19 | 2     | 0     | 0    | 0           | 0           | 1             | 1             |
|          | 3   | 1.22 | 22    | 0     | 0    |             |             |               |               |
| <b>2</b> | 4   | 1.23 | 26    | 5     | 0    | 0.0081301   | 0.001626    | 0.2855        | 0.052         |
|          | 12  | 1.31 | 150   | 1     | 1    |             |             |               |               |
| <b>3</b> | 13  | 2.01 | 162   | 63    | 1    | 0.02186     | 0.00069396  | 0.1035        | 0.01          |
|          | 24  | 2.12 | 293   | 3     | 3    |             |             |               |               |
| <b>4</b> | 25  | 2.13 | 295   | 147   | 3    | 0.053455    | 0.00036364  | 0.0191        | 0.01          |
|          | 36  | 2.24 | 181   | 4     | 4    |             |             |               |               |
| <b>5</b> | 37  | 2.25 | 161   | 119   | 4    | 0.067922    | 0.0022831   | 0.0118        | 0.01          |
|          | 52  | 3.11 | 73    | 8     | 8    |             |             |               |               |
| <b>6</b> | 53  | 3.12 | 65    | 64    | 8    | 0.11636     | 0           | 0.017         | 0.01          |
|          | 73  | 4.01 | 10    | 8     | 8    |             |             |               |               |
| <b>7</b> | 74  | 4.02 | 9     | 9     | 8    | 0.067164    | 0.0074627   | 0             | 0             |
|          | 97  | 4.26 | 3     | 9     | 9    |             |             |               |               |
| <b>8</b> | 98  | 4.27 | 3     | 3     | 9    | 0.036145    | 0           | 0             | 0             |
|          | 140 | 6.08 | 0     | 9     | 9    |             |             |               |               |

Second it needs to determine the parameters  $\beta'_{ij}$ 's in SARDDE (1). One can assume that  $S = 1$  because the effects of  $S$  can be deleted by calculated  $\beta'_{ij}$ 's. This makes the calculated  $\beta'_{ij}$ 's have general sense. Using the real

world data of the first COVID-19 epidemic in Beijing [13] (also see the second row in Table 1) selects following initial condition

$$(I(0), I_a(0), I_r(0), I_{ra}(0), D(0)) = (2, 0, 0, 0, 0).$$

**Note** The infection rate  $\beta'_{ij}$ s are difficult to be determined. However if we know the number of current symptomatic infected individuals at day 0 and day T when no prevention and control measures had been implemented. Additional the number of current asymptomatic infected individuals was very small. Then we can estimate  $\beta'_{11}$  from equation (1a) as follows

$$\beta_{11} \sim \kappa(1) + \alpha(1) + \frac{1}{T} \ln \left( \frac{I(T)}{I(0)} \right) \approx 0.7993. \quad (28)$$

Substitute parameters  $\kappa(1), \alpha(1), \theta_1(1)$  and  $\theta_2(1)$  given in Table 1 into SARDDE (1). Using a minimization error square criterion

$$\delta = \min_{\beta_{ij} \in [0,1] \in [0,1]} \sqrt{(I(3) - 22)^2 + (I_r(3) - 0)^2 + (D(3) - 0)^2}$$

determines  $\beta'_{ij}$ s.

A group  $(\beta_{11}, \beta_{12}, \beta_{21}, \beta_{22})$  that makes  $\delta$  be “smallest” (considering continued simulations) are

$$(\beta_{11}, \beta_{12}, \beta_{21}, \beta_{22}) = (0.75454, 0.48757, 0.11989, 0.07993). \quad (29)$$

The first 4 days’ simulations of SARDDE (1) with the above equation parameters are shown in Figs. 4(a) and 4(b). The simulation results are in good agreement with the reported clinical data (see the first solid line and the first dash line, and the legends in Figs. 4(a) and 4(b)).

Third it needs to determine:  $\theta_1(i), \theta_2(i), i = 2, 3, \dots, 8$ . Denote

$$t_2 = 3, t_3 = 12, t_4 = 24, t_5 = 36, t_6 = 52, t_7 = 73, t_8 = 97.$$

Let  $I_c(t_i)$  to be the number of the reported current symptomatic infected individuals at  $t_i$  in the first COVID-19 epidemic in Beijing. Let  $I_{cr}(t_i)$  and  $D_c(t_i)$  to be the numbers of the reported cumulative recovered infected and the died individuals at  $t_i$ , respectively.

Using the minimization error square criterion:

$$\delta = \min_{\theta_1(i), \theta_2(i) \in [0,1]} \sqrt{(I(t_i) - I_c(t_i))^2 + (I_r(t_i) - I_{cr}(t_i))^2 + (D(t_i) - D_c(t_i))^2} \quad (30)$$

determines the  $\theta_1(i)$ 's and  $\theta_2(i)$ 's. The calculated results are shown in Table 1. The corresponding simulation results of SARDDE (1) are shown in Figs. 4(a) and 4(b). Observe that the simulation results of SARDDE (1) describe well the dynamics of the first COVID-19 epidemic in Beijing (see the solid lines and the dash lines and the legends in Figs. 4(a) and 4(b)).

### 3.1.2 Discussions

- (1) On day 0, day 3, and day 140, the numbers of the reported and simulated current symptomatic individuals are approximate the same. On day 12, day 36, day 73 and day 97, there are only one or two differences. On day 24 and day 52, there are 3 (relative error 1.02%) and 5 (relative error 6.85%) differences.

**Table 2** The criteria of the asymptotical stability and disease spreading of the disease free equilibrium of SARDDE (1) over 8-time intervals.

| $i$ | Day | $\theta_1(i)$ | $\theta_2(i)$ | $a_{11} + a_{22}$ | $a_{12}a_{21} - a_{11}a_{22}$ | $S_p^1$   | $S_p^2$ |
|-----|-----|---------------|---------------|-------------------|-------------------------------|-----------|---------|
| 1   | 0   | 1             | 1             | 0.69161           | 0.10594                       | $\infty$  | 7.1535  |
| 2   | 4   | 0.2855        | 0.052         | 0.066964          | 0.029394                      | 0.4695    | 1.9691  |
| 3   | 13  | 0.1035        | 0.01          | -0.086517         | 0.0079505                     | 0.028822  | 1.1134  |
| 4   | 25  | 0.0191        | 0.01          | -0.18146          | -0.0055869                    | 0.0032844 | 0.80667 |
| 5   | 37  | 0.0118        | 0.01          | -0.20336          | -0.0087015                    | 0.0029741 | 0.62098 |
| 6   | 53  | 0.017         | 0.01          | -0.24559          | -0.014698                     | 0.015805  | 0.36595 |
| 7   | 74  | 0             | 0             | -0.21748          | -0.010661                     | 0         | 0       |
| 8   | 98  | 0             | 0             | -0.179            | -0.0051636                    | 0         | 0       |

- (2) On day 0, day 3, day 12 and day 140, the numbers of the reported and the simulated current recovered symptomatic individuals are approximate the same. On day 52 and day 97, there are 2 and 3 differences, respectively. On day 24, day 36 and day 73, there are 7 , 5, and 6 differences (relative error -10.3%, -2.33%, +1.51% ), respectively.
- (3) On day 0, day 3, day 12, day 24, day 36, day 52, day 73, day 97 and day 140, the numbers of the reported and simulated cumulative died individuals are approximate the same.
- (4) There is no information on the current symptomatic infected and recovered symptomatic infected individuals. But it has reported that after the 73 day, April 1, there is no symptomatic infected individuals until day 143, June 11 [13]. Our simulation results shows that on day 73, the number of the simulated current symptomatic infected individuals was less than one ( $\approx 0.7$ ), which seems to explain the actual report data.
- (5) Computed results (see (29)) of the transmission rates  $\beta'_{i,j}$ 's show that the ratio of the transmission rates of asymptomatic and symptomatic individuals infecting susceptible population to become symptomatic individuals is about 0.159 ( $\beta_{21}:\beta_{11}$ ). It suggests that the asymptomatic individuals cause lesser symptomatic spread than the symptomatic individuals do.
- (6) The computed results (see (29)) also show that the ratios of the transmission rates of the asymptomatic and the symptomatic individuals infecting susceptible population to become the asymptomatic and the symptomatic individuals are about 0.646 ( $\beta_{12}:\beta_{11}$ ) and 0.667 ( $\beta_{22}:\beta_{21}$ ), respectively. It suggests that both the symptomatic and the asymptomatic individuals cause lesser asymptomatic spreads than symptomatic spreads.
- (7) The criteria (7) and (8) of the asymptotical stability of the disease-free equilibrium of SARDDE model (1) over the 8-time intervals are shown in the 5th ~ 8th columns of Table 2. It is shown that until the blocking rates  $(1 - \theta_1, 1 - \theta_2)$  reach about (98.09%, 99%), the disease-free equilibrium becomes globally asymptotical stability. The conditions (9) and (10) of disease spreading are listed in the last two columns in Table 2. It shows also that if the blocking rates  $(\theta_1, \theta_2)$  reach about (98.09%, 99%), the spreading of COVID-19 epidemic can be blocked .

### 3.1.3 Virtual Simulations

Now assume that after day 24, 12 February, it still keeps the blocking rates  $(1 - \theta_1(3), 1 - \theta_2(3)) \approx (89.65\%, 99\%)$ , the cure rates  $(\kappa(3), \kappa_a(3))$ , and the died rate  $\alpha(3)$  until day 140, 8 June. The simulation results of SARDDE (1) are shown in Figs 5(a) and 5(b). Observe that the numbers of current symptomatic and the asymptomatic infected individuals reach about  $1.899e5$  and  $4679$ , respectively. The numbers of cumulative recovered symptomatic and died individuals reach about  $74278$  and  $2359$ , respectively.

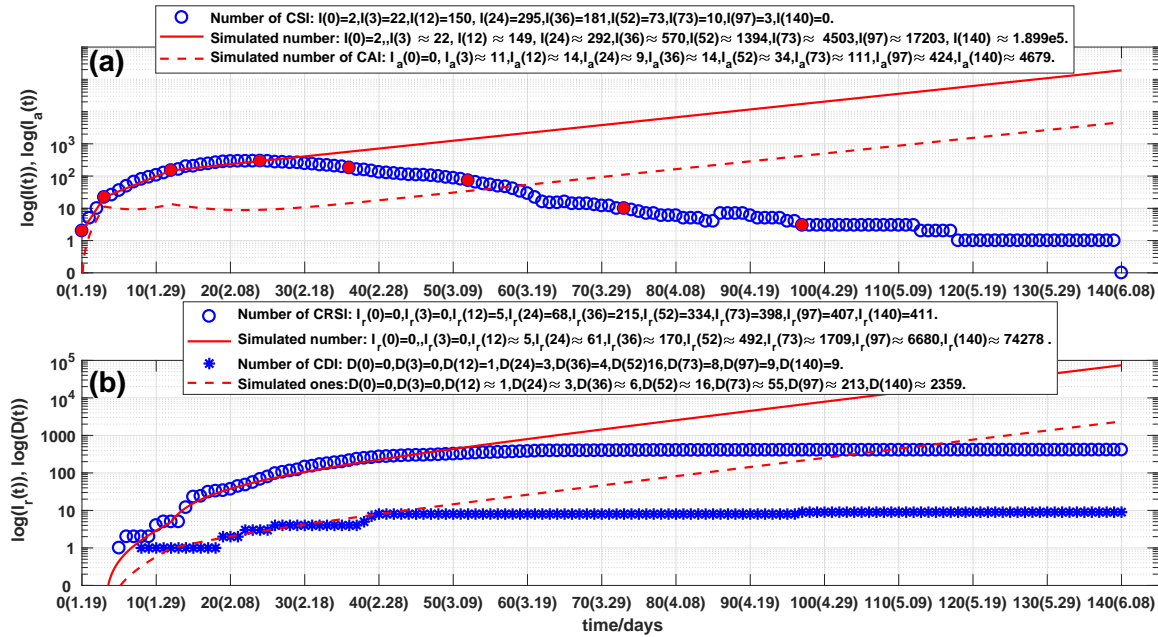

Figure 5 Virtual simulations: (a) Outcome of the number of the current symptomatic individuals (CSI), representing by circles. Solid lines and dash lines are outcomes of the corresponding simulations of SARDDE (1). (b) Outcomes of the numbers of the cumulative recovered symptomatic individuals (CRSI) and the cumulative died individuals (CDI), representing by circles and stars, respectively. Solid lines and dash lines are the corresponding simulations of SARDDE (1).

Furthermore assume that after day 52, 11 March, it still keeps the blocking rates  $(1 - \theta_1(5), 1 - \theta_2(5)) \approx (98.3\%, 99\%)$ , the cure rates  $(\kappa(5), \kappa_a(5))$ , and the died rate  $\alpha(5)$  until day 140, 8 June. The simulation results of SARDDE (1) are shown in Figs 6(a) and 6(b). Observe that the numbers of current symptomatic and asymptomatic infected individuals are both less than one, respectively; the numbers of cumulative recovered symptomatic and died individuals are about 411 and 11, respectively. The results suggest that using the data before day 52 (about 17 days after the turning point) can approximately estimate the following outcome of the first COVID-19 epidemic in Beijing.

In summary, SARDDE (1) can simulate the outcomes of the first COVID-19 epidemic in Beijing. The calculated equation parameters can help us to understand and explain the mechanism of epidemic diseases and control strategies for the event of the practical epidemic.

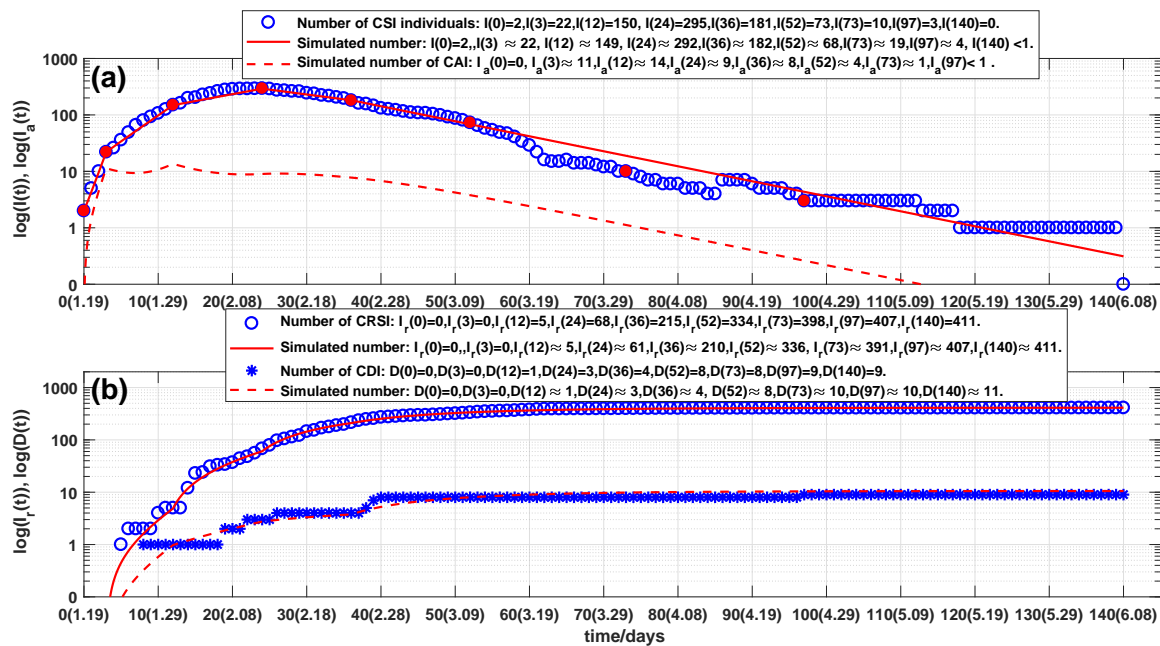

**Figure 6 Virtual simulations:** (a) Outcome of the number of the current symptomatic individuals (CSI), representing by circles. Solid lines and dash lines are outcomes of the corresponding simulations of SARDDE (1). (b) Outcomes of the numbers of the cumulative recovered symptomatic individuals (CRSI) and the cumulative died individuals (CDI), representing by circles and stars, respectively. Solid lines and dash lines are the corresponding simulations of SARDDE (1).

### 3.2 Simulation and prediction of the second COVID-19 epidemic in Beijing

This Section will discuss the applications of Theorem 3, Theorem 4 and SARDDE (11) to simulate the real-world COVID-19 epidemic data from 11 June to 6 August 2020 in Beijing [13]. This event of the second epidemic in Beijing provides a valuable example of accurate preventing and controlling strategies and excellent clinical treatments. The data of the symptomatic and asymptomatic infected and recovered individuals provide a footstone to modeling the event.

#### 3.2.1 Modeling and Simulation

Figure 7(a) show that the reported data on the current confirmed symptomatic infection cases. Figure 7(b) show that the reported data on the cumulative recovered symptomatic infection cases. Figure 8(a) show that the reported data on the current confirmed asymptomatic infection cases. Figure 8(b) show that the reported data on the cumulative recovered asymptomatic infection cases. All data set were edited from [13].

The evolution of the current symptomatic infected individuals, and the current asymptomatic infected individuals are shown in Fig. 9(a) by circles and diamonds, respectively. The evolution of the cumulative recovered symptomatic infected individuals, and the cumulative recovered asymptomatic infected individuals are shown in Fig. 9(b) by circles and diamonds, respectively.

Observe from Fig.9 that the overall changes in the number of the current confirmed infections are not subject to the law of exponential changes, but the data can be approximated in good agreement with 7 straight lines

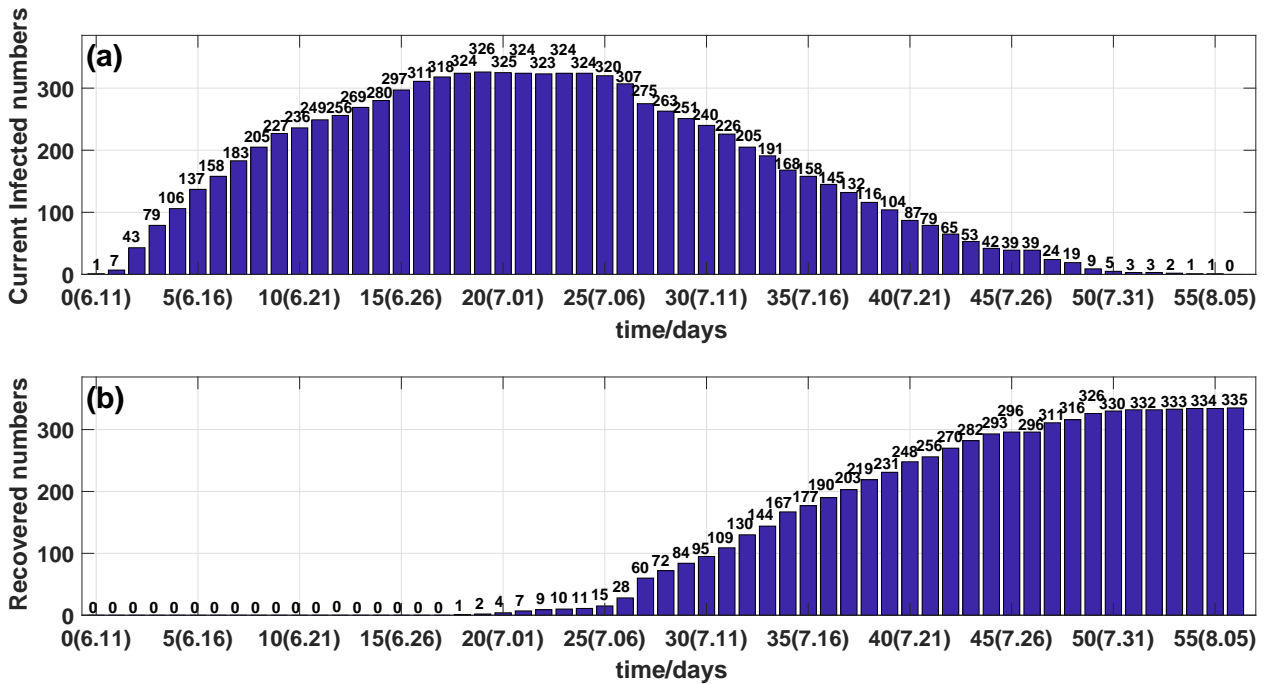

Figure 7 (a) Outcome of the number of the current symptomatic infected individuals. (b) Outcome of the number of the cumulative recovered symptomatic infected individuals.

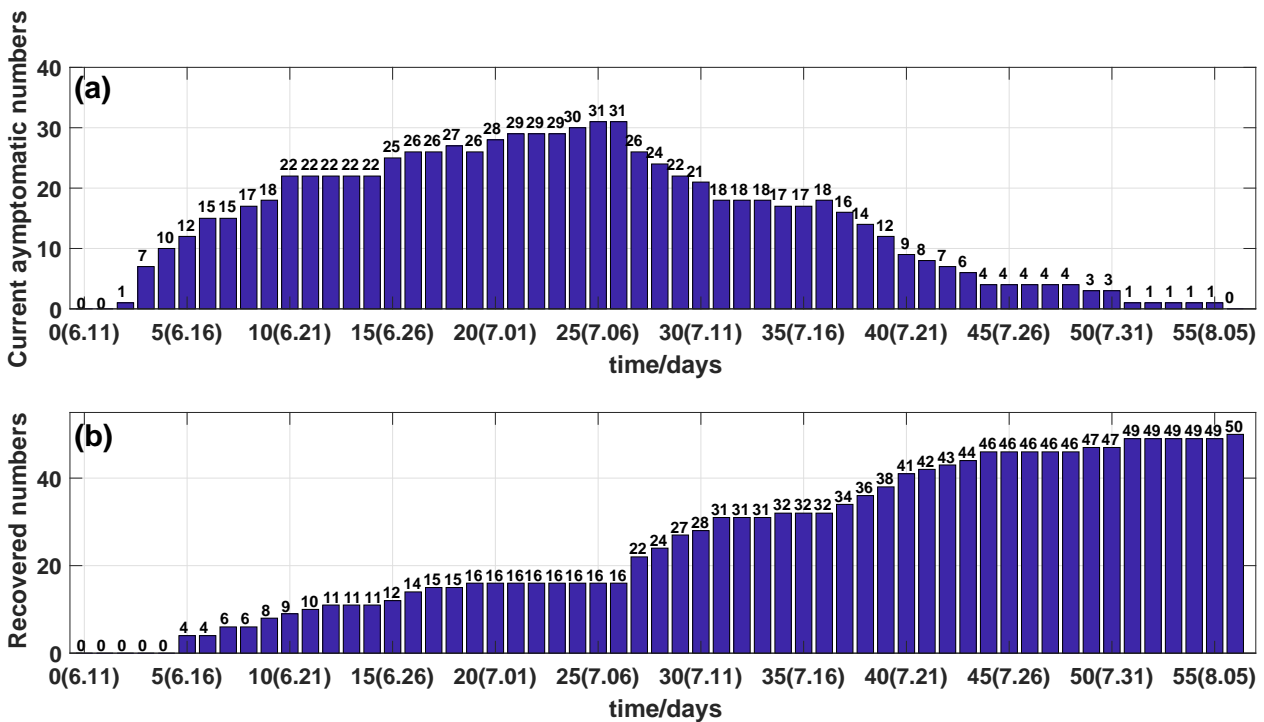

Figure 8 (a) Outcome of the number of the current asymptomatic infected individuals. (b) Outcome of the number of the cumulative recovered asymptomatic infected individuals.

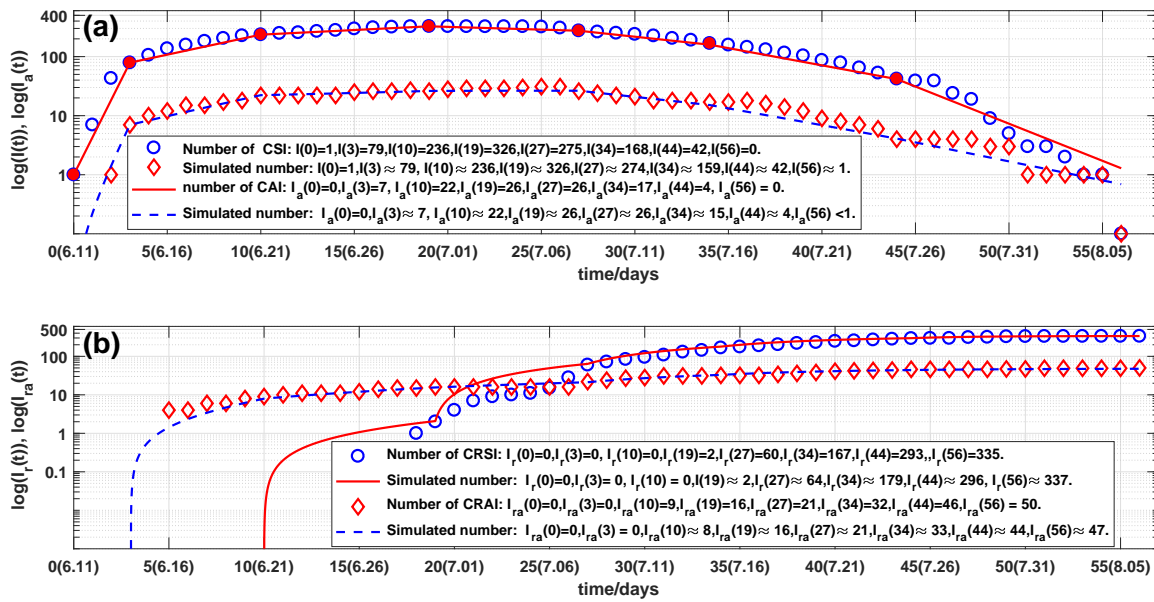

Figure 9 Outcomes of the numbers of: (a) the current symptomatic individuals (CSI) and the current asymptomatic individuals (CAI), representing by circles and diamonds. Solid lines and dash lines are the corresponding simulations of SARDDE (11). Outcomes of the numbers of: (b) the cumulative recovered symptomatic individuals (CRSI) and the cumulative recovered asymptomatic individuals (CRAI), representing by circles and diamonds, respectively. Solid lines and dash lines are the corresponding simulations of SARDDE (11).

in log scale (see Fig.9). This phenomenon can be explained as different medical measures and prevention and control strategies have been adopted over different 7-time intervals. Therefore the  $i$  in SARDDE (11) satisfies  $i = 1, 2, \dots, 7$ .

First it needs to determine the parameters  $\kappa(i), \kappa_a(i)$ . Denote  $s_1(i)$  and  $s_2(i)$  to be the days that the old patients and the new patients stayed in the hospital during  $i$ th time interval.  $s_{a1}(i)$  and  $s_{a2}(i)$  to be the days that the old asymptomatic individuals and the new asymptomatic individuals stayed in the hospital during  $i$ th time interval. Denote  $R(i)$  and  $R_a(i)$  to be the numbers of the recovered symptomatic patients and asymptomatic patients over the  $i$ th time interval, respectively. Then  $\kappa(i)$  and  $\kappa_a(i)$  can be defined by

$$\kappa(i) = \frac{R(i)}{s_1(i) + s_2(i)} \quad (31)$$

$$\kappa_a(i) = \frac{R_a(i)}{s_{a1}(i) + s_{a2}(i)} \quad (32)$$

Denote  $t_i$  and  $t_{i+1}$  to be the first date and the last date in the  $i$ th time interval. Denote  $I_1(t_i)$  = the number of the current symptomatic infected individuals on day  $t_i$ ,  $I_2(t_i)$  = the number of the daily recovered symptomatic infected individuals,  $I_3(t_i)$  = the number of the daily increased symptomatic infected individuals.

Then we obtain

$$s_1(i) = (I_1(t_i) - \sum_{j=1}^{t_{i+1}-t_i} I_2(t_i + j))(t_{i+1} - t_i) + [1, 2, \dots, t_{i+1} - t_i] \times [I_2(t_i + 1), I_2(t_i + 2), \dots, I_2(t_{i+1})]^T \tag{33}$$

$$s_2(i) = [t_{i+1} - t_i, t_{i+1} - t_i - 1, \dots, 1] \times [I_3(t_i), I_3(t_i + 1), \dots, I_3(t_{i+1})]^T \tag{34}$$

$$R(i) = \sum_{j=0}^{t_{i+1}-t_i} I_2(t_i + j). \tag{35}$$

Similarly, we can define  $R_a(i), s_{a1}(i), s_{a2}(i)$ . The calculated  $\kappa(i)$ 's and  $\kappa_a(i)$ 's are shown in Table 3.

**Table 3** The data of the second wave COVID-19 epidemics on 7 different days and the corresponding calculated parameters of SARDDE model (11). Where NCSII and NCAII represent the numbers of the current symptomatic infected individuals and the current asymptomatic infected individuals, respectively; NRSII and NRAII represent the numbers of the cumulative recovered symptomatic infected individuals and the asymptomatic infected individuals over the  $i$ th interval.

| $i$ | Day | Date | NCSII | NCAII | NRSII | NRAII | $\kappa(i)$ | $\kappa_a(i)$ | $\theta_1(i)$ | $\theta_2(i)$ |
|-----|-----|------|-------|-------|-------|-------|-------------|---------------|---------------|---------------|
| 1   | 0   | 6.11 | 1     | 0     | 0     | 0     | 0           | 0             | 1             | 1             |
|     | 3   | 6.14 | 79    | 7     | 0     | 0     | 0           | 0             | 1             | 1             |
| 2   | 4   | 6.15 | 106   | 10    | 0     | 9     | 0           | 0.085714      | 0.107         | 0.165         |
|     | 10  | 6.21 | 236   | 22    | 0     | 9     | 0           | 0.085714      | 0.107         | 0.165         |
| 3   | 11  | 6.22 | 249   | 22    | 2     | 7     | 8.3056e-4   | 0.035         | 0.0253        | 0.034         |
|     | 19  | 6.30 | 326   | 26    | 2     | 7     | 8.3056e-4   | 0.035         | 0.0253        | 0.034         |
| 4   | 20  | 7.01 | 325   | 28    | 58    | 6     | 0.025732    | 0.027149      | 0.0029        | 0.0181        |
|     | 27  | 7.08 | 275   | 26    | 58    | 6     | 0.025732    | 0.027149      | 0.0029        | 0.0181        |
| 5   | 28  | 7.09 | 263   | 24    | 107   | 10    | 0.077762    | 0.082645      | 0             | 0.002         |
|     | 34  | 7.15 | 168   | 17    | 107   | 10    | 0.077762    | 0.082645      | 0             | 0.002         |
| 6   | 35  | 7.16 | 158   | 17    | 126   | 14    | 0.13419     | 0.13084       | 0             | 0             |
|     | 44  | 7.25 | 42    | 4     | 126   | 14    | 0.13419     | 0.13084       | 0             | 0             |
| 7   | 45  | 7.26 | 39    | 4     | 42    | 4     | 0.28966     | 0.14815       | 0             | 0             |
|     | 56  | 8.06 | 0     | 0     | 42    | 4     | 0.28966     | 0.14815       | 0             | 0             |

Second it needs to determine the parameters  $\beta'_{ij}$ s in SARDDE (11). One can assume that  $S = 1$  because the effects of S can be deleted by calculated  $\beta'_{ij}$ s. This makes the calculated  $\beta'_{ij}$ s have general sense. Similar to (36), we have

$$\beta_{11} \sim \kappa(1) + \frac{1}{T} \ln \left( \frac{I(T)}{I(0)} \right) \approx 1.4565. \tag{36}$$

Using the practical data of the second COVID-19 epidemic (also see the second line in Table 3) selects following initial condition

$$(I(0), I_a(0), I_r(0), I_{ra}(0)) = (1, 0, 0, 0). \tag{37}$$



Substitute parameters  $\kappa(1)$ ,  $\kappa_a(1)$ ,  $\theta_1(1)$  and  $\theta_2(1)$  showed in Table 3 into SARDDE (11). Using a minimization error square criterion

$$\delta = \min_{\beta_{ij} \in [0, 1.5]} \sqrt{(I(3) - 79)^2 + (I_a(3) - 7)^2} \quad (38)$$

determines  $\beta'_{ij}$ s. A group  $\beta'_{ij}$ s that makes  $\delta$  be “smallest” are

$$(\beta_{11}, \beta_{12}, \beta_{21}, \beta_{22}) = (1.45211, 0.0728241, 0.0728241, 0.728241). \quad (39)$$

The simulations of SARDDE (11) with the above model parameters are shown in Figs. 9(a) and 9(b). Observe that the simulation results are in good agreement with the reported first 4 days’ clinical data (see the solid and dash lines in Figs. 9(a) and 9(b)).

Third it needs to determine:  $\theta_1(i)$ ,  $\theta_2(i)$ ,  $i = 2, 3, \dots, 7$ . Denote

$$t_1 = 10, t_2 = 19, t_3 = 27, t_4 = 34, t_5 = 44, t_6 = 56.$$

Let  $I_c(t_i)$  and  $I_{ca}(t_i)$  to be the numbers of the current symptomatic and asymptomatic infected individuals at time  $t_i$ , respectively;  $I_{cr}(t_i)$  and  $I_{cra}(t_i)$  to be the numbers of the cumulative recovered symptomatic and asymptomatic infected individuals at time  $t_i$ , respectively.

Using the minimization error square criterion:

$$\delta = \min_{\theta_1(i), \theta_2(i) \in [0, 1]} \sqrt{(I(t_i) - I_c(t_i))^2 + (I_a(t_i) - I_{ca}(t_i))^2 + (I_r(t_i) - I_{cr}(t_i))^2 + (I_{ra}(t_i) - I_{cra}(t_i))^2}$$

determines the  $\theta_1(i)$  and  $\theta_2(i)$ . The calculated results are shown in Table 3. The corresponding simulation results of SARDDE (11) are shown in Fig. 9(a) and 9(b). Observe that the simulation results of model (11) describe well the dynamics of the second COVID-19 epidemic in Beijing.

### 3.2.2 Discussions

- (1) On day 0, day 3, day 10, day 19, and day 44, the numbers of the reported and simulated current symptomatic individuals are approximate the same. On day 27 and day 56, they have only one difference. On day 34, they have 9 differences (relative error -5.3%).
- (2) On day 0, day 3, day 10, day 19, day 27, day 44 and day 56, the numbers of the practical and the simulated current asymptomatic individuals are approximate the same. On day 34, it has only two differences.
- (3) On 0 day, 3, 10 and 19, the numbers of the practical and the simulated cumulative recovered symptomatic individuals are approximate the same. On day 56 and day 44, they has two and three differences, respectively. On day 27, it has 4 differences (relative error +6.7%). On day 34, it has 12 differences (relative error +7.2%).
- (4) On day 0, day 3, day 19, and day 27, the numbers of the practical and the simulated cumulative recovered asymptomatic individuals are approximate the same. On day 10 and day 34, they have only one difference. On day 44 and day 56, they has two and three differences, respectively.
- (5) Computed results (see (39)) show that the ratio of the transmission rates of the asymptomatic and the symptomatic individuals infecting susceptible population to become the symptomatic individuals is about 5% ( $\beta_{21} : \beta_{11}$ ). It suggests that the asymptomatic individuals cause lesser symptomatic spread than the symptomatic individuals do.

**Table 4 Criteria of the asymptotical stability and disease spreading of disease-free equilibrium of SARDDE (11) over 7-time intervals.**

| $i$ | Day | $\theta_1(i)$ | $\theta_2(i)$ | $a_{11} + a_{22}$ | $a_{12}a_{21} - a_{11}a_{22}$ | $S_p^1$   | $S_p^2$   |
|-----|-----|---------------|---------------|-------------------|-------------------------------|-----------|-----------|
| 1   | 3   | 1             | 1             | 1.5249            | -1.0522                       | $+\infty$ | $+\infty$ |
| 2   | 10  | 0.107         | 0.165         | 0.16317           | -0.0052584                    | $+\infty$ | 2.8862    |
| 3   | 19  | 0.0253        | 0.034         | 0.03775           | 0.00037225                    | 0.31426   | 1.5864    |
| 4   | 27  | 0.0029        | 0.0181        | -0.02131          | -0.00030032                   | 0.0013872 | 0.98941   |
| 5   | 34  | 0             | 0.002         | -0.077762         | -0.0063134                    | 0         | 0.036159  |
| 6   | 44  | 0             | 0             | -0.13419          | -0.017557                     | 0         | 0         |
| 7   | 56  | 0             | 0             | -0.28966          | -0.042913                     | 0         | 0         |

- (6) Computed results (see (39)) also show that the ratios of the transmission rates of the asymptomatic and symptomatic individuals infecting susceptible population to become the asymptomatic and symptomatic individuals are about 5% ( $\beta_{12} : \beta_{11}$ ) It suggests that the symptomatic individuals cause lesser asymptomatic spread than symptomatic spread.
- (7) The criteria of the stability of the disease-free equilibrium of SARDDE (11) at 7-time intervals are shown in Table 4. It shows that the blocking rates reach about (97.47%, 96.6%) cannot prevent the spread of the second COVID-19 epidemic in Beijing; the blocking rates ( $1 - \theta_1, 1 - \theta_2$ ) reach about ( 99.71%, 98.19%), the disease-free equilibrium becomes globally asymptotical stable.

### 3.2.3 Virtual Simulation

Now assume that it keeps still the blocking rates ( $1 - \theta_1(3), 1 - \theta_2(3)$ )  $\approx$  (97.47%, 96.6%) and the cure rates ( $\kappa(3), \kappa_a(3)$ ) until day 56, 6 August. The simulation results of SARDDE (11) are shown in Fig.10. Observe that on day 56, the numbers of the current symptomatic and asymptomatic infected individuals reach about 1236 and 72, respectively; The numbers of the cumulative recovered symptomatic and asymptomatic infected individuals reach 23 and 72, respectively.

Furthermore assume that after the day 34th, 14 July, it still keeps the blocking rates ( $1 - \theta_1(5), 1 - \theta_2(5)$ ), the cure rates ( $\kappa(5), \kappa_a(5)$ ) until day 56, 6 August. The simulation results of SARDDE (11) are shown in Figs. 11(a) and 11(b). Observe that on day 56, the numbers of the current symptomatic and asymptomatic infected individuals reach about 29 and 3, respectively. The numbers of the cumulative recovered symptomatic and the asymptomatic individuals are about 309 and 46, respectively. The results suggest that using the data before day 34 (about two weeks after the turning point) can approximately to estimate the following outcome of the second COVID-19 academic in Beijing.

## 4 Conclusions

The main contributions of this paper are summarized as follows:

- (1) Proposed the SARDDE models ((1) and (11)) which describe epidemic transmissions and controls.

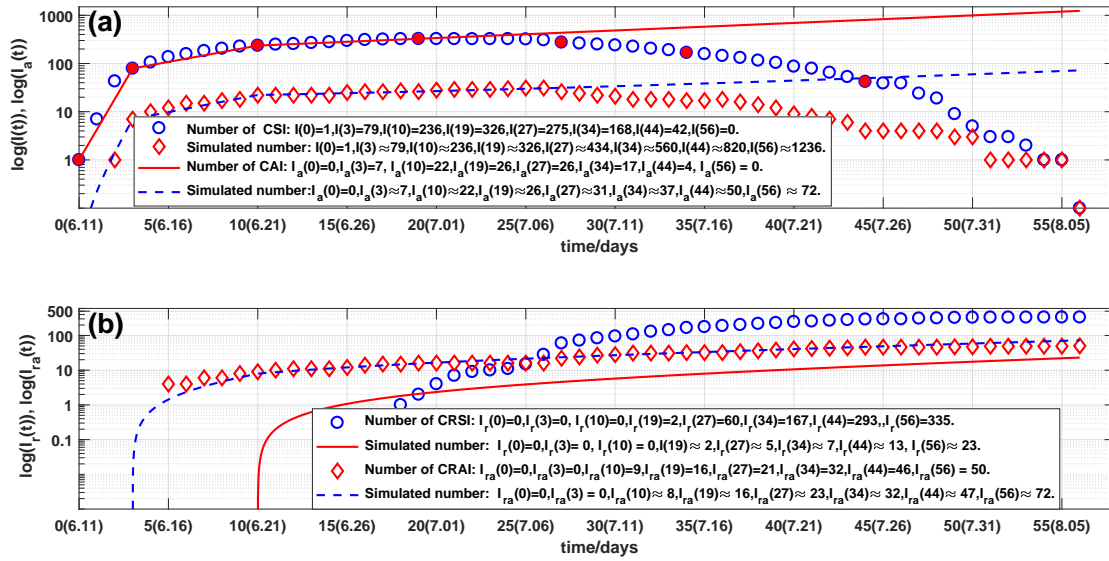

Figure 10 Virtual simulations. Outcomes of the numbers of: (a) the current symptomatic individuals (CSI) and the current asymptomatic individuals (CAI), representing by circles and diamonds. Solid lines and dash lines are the corresponding simulations of SARDDE (11). Outcomes of the numbers of: (b) the cumulative recovered symptomatic individuals (CRSI) and the cumulative recovered asymptomatic individuals (CRAI), representing by circles and diamonds, respectively. Solid and dash lines are the corresponding simulations of SARDDE (11).

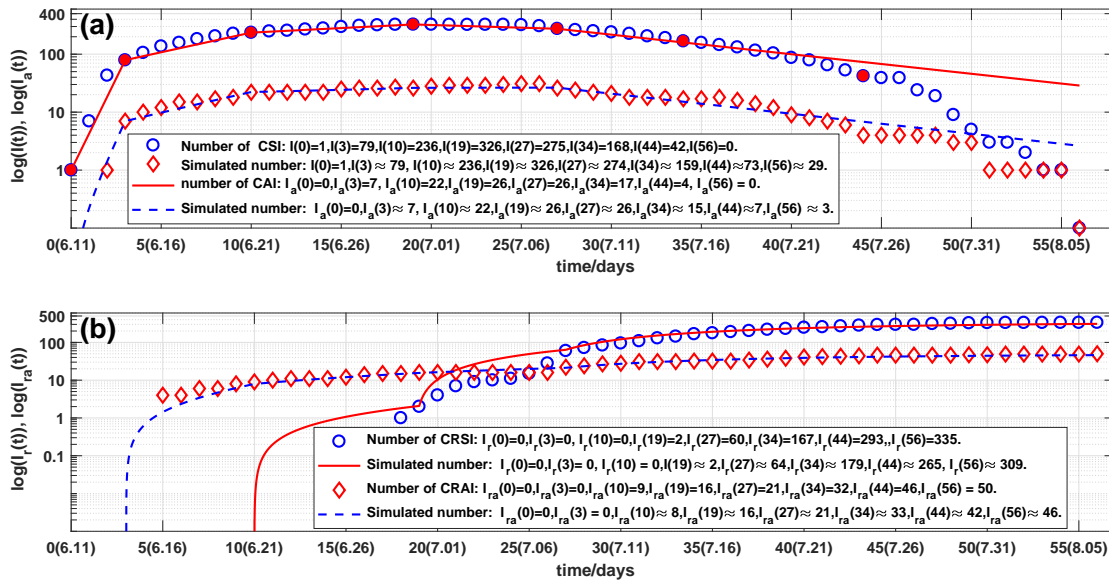

Figure 11 Virtual simulations. Outcomes of the numbers of: (a) the current symptomatic individuals (CSI) and the current asymptomatic individuals (CAI), representing by circles and diamonds. Solid lines and dash lines are the corresponding simulations of SARDDE (11). Outcomes of the numbers of: (b) the cumulative recovered symptomatic individuals (CRSI) and the cumulative recovered asymptomatic individuals (CRAI), representing by circles and diamonds, respectively. Solid and dash lines are the corresponding simulations of SARDDE (11).

- (2) Provided the criterion inequalities for the asymptotical stability of the disease free equilibrium point of SARDDE (see Theorem 1 and Theorem 3).
- (3) Presented the criterion inequalities for epidemic transmission (see Theorem 2 and Theorem 4) of the symptomatic and asymptomatic infections.
- (4) Determined model parameters interpreted quantitatively the outcomes of the first and second epidemics in Beijing.
- (5) Numerical simulation results suggest that
  - (i) 100% block rates were implemented after infection appeared 73 days and 34 days for the first and second epidemics, respectively.
  - (ii) Block rates of 90% and 97.5% to symptomatic infections cannot prevent the spreads of the first and second epidemics, respectively (see Fig.5 and Fig.10).
  - (iii) The transmission rate of symptomatic individuals of the first epidemic was about two time larger than that of the second epidemic ( 1.4492:0.75454 (see (29) and (39))).
  - (iv) Using the data form the beginning to the day after about two weeks from the turning points, we can estimate well or approximately the following outcomes of the first or second COVID-19 academics in Beijing (see Fig.6 and Fig.11).
  - (v) Numerically interpreted that both symptomatic and asymptomatic individuals cause lesser asymptomatic spread than symptomatic spread (see (29) and (39)).
  - (vi) The lack of the data of the asymptomatic infected individuals in the first COVID-19 in Beijing may prevent the accurate determinations of the number of asymptomatic infected individuals.
  - (vii) On day 24—the turning point day of the first epidemics in Beijing, the calculated blocking rate of the symptomatic infections was about 89.65%. On day 19—the turning point day of the second epidemics in Beijing, the calculated blocking rate of the symptomatic infections was about 97.47%. The calculated blocking rates provide a quantitative interpretation that the clearing up days of the hospitalized individuals of the first and second epidemics in Beijing were about 87 days and 25 days, respectively.
- (6) The selections of the transmission rates  $\beta'_{ij}$ s are difficult because different combinations of  $\beta'_{ij}$ s can produce very closed simulation errors. Agreements of followed simulations are used to judge the reasonableness of the selected  $\beta'_{ij}$ s.
- (7) The proposed two SARDDEs are simpler than those given in Ref. [10]. However they can better describe and explain the real world data [13].

Because not all infected people can go to the hospital for treatment and be confirmed at the first time. In some cases: adequate resources, no shortage of beds and medical treatment advantages, patients may be left behind when they are discharged from the hospital. Therefore, it does not have very important practicality, that the simulation results of the model are required accurately describe every datum reported on the epidemic. Long-term accumulated data, such as the total number of patients and the number of deaths may eliminate short-term deviations. Therefore, the accuracy of predicting long-term epidemics should be the standard for evaluating the rationality of the selected model and unknown model parameters.

When a society cannot withstand 100% of the transmission blocking load, how can administrative authorities take measures to avoid multiple outbreaks? A recommendation is that the authorities need to at least maintain the prevention and control measures implemented 7 days after reaching the turning point. Administrative authorities

need to persuade their society to implement a prevention and control strategy to be withstood until all infection cases are cleared up. It is not a wise strategy to withdraw all prevention and control measures before the number of the all infected people have been cleared up. 100% blocking rate to transmission of COVID-19 infection is the keystone strategy to clear up or reduce spread of an epidemic as early as possible.

The strict prevention and control strategies implemented by Beijing government is not only effective but also necessary. It is expected that the research can provide better understanding, explanation, and dominating the spreads and control measures of epidemics.

**Funding** The author has not declared a specific grant for this research.

**Conflict of Interest** The author declares no potential conflict of interest.

**Ethical Statement** Not applicable/No human participants included.

**ORCID iD** Lequan Min <http://orcid.org/0000-0002-4414-3818>.

**Note** The previous versions of the manuscript have been published online [10, 14].

## References

- [1] D. Daley and J. Gani, *Epidemic Modeling: An Introduction*. New York: Cambridge University Press, 2005.
- [2] S. Zhao and H. Chen, “Modeling the epidemic dynamics and control of COVID-19 outbreak in China,” *Journal of Thoracic Disease*, vol. 8, no. 1, pp. 11–19, 2020.
- [3] Z. Yang, Z. Zeng, and Wang, K. et al., “Modified SEIR and AI prediction of the epidemics trend of covid-19 in China under public health interventions,” *Journal of Thoracic Disease*, vol. 12, no. 3, pp. 165–174, 2020.
- [4] S. Zhao, Q. Linc, and Ran, R. et al., “Preliminary estimation of the basic reproduction number of novel coronavirus (2019-nCoV) in China, from 2019 to 2020: A data-driven analysis in the early phase of the outbreak,” *International Journal of Infectious Diseases*, vol. 92, pp. 214–217, 2020.
- [5] K. Roosa, Y. Lee, and Luo R. et al., “Real-time forecasts of the COVID-19 epidemic in China from February 5th to February 24th, 2020,” *Infectious Disease Modelling*, vol. 5, pp. 256–263, 2020.
- [6] B. Tang, N. L. Bragaazzi, and Li, Q. et al., “An updated estimation of the risk of transmission of the novel coronavirus (2019-nCov),” *Infectious Disease Modelling*, vol. 5, pp. 248–255, 2020.
- [7] X. Li and Z. Li, “Study on transmission model of the novel coronavirus (in Chinese),” 2020, <http://www.paper.edu.cn/releasepaper/content/202002-42>(accessed July 3 2021).
- [8] N. Chintalapudia, G. Battinenia, and Sagaroa, G. G. et al., “COVID-19 outbreak reproduction number estimations and forecasting in Marche, Italy,” *International Journal of Infectious Diseases*, vol. 96, pp. 327–333, 2020.
- [9] S. L. Chang, H. N., and Zachreson C. et al., “Modelling transmission and control of the COVID-19 pandemic in australia,” *Nature Communications*, vol. 11, no. 5710, pp. 1–13, 2020.
- [10] L. Min, “Simulations and estimations of COVID-19 epidemics in Beijing and Shanghai,” 2020, <http://www.paper.edu.cn/releasepaper/content/202008-2>(accessed July 3 2021).

- [11] R. Niu, Y. C. Chan, and Wong, E. W. M. et al., “A stochastic SEIHR model for COVID-19 data fluctuations,” *Nonlinear Dyn.*, no. <https://doi.org/10.1007/s11071-21-06631>, pp. 1–13, July 2021.
- [12] J. O. Lloyd-Smith, S. Funk, and McLEAND, A. R. et al., “Nine challenges in modelling the emergence of novel pathogens,” *Epidemics*, no. 10, pp. 35–39, 2015.
- [13] Health Commission of Beijing, “Epidemic bulletin (in Chinese),” 2020-02-19-08-06, <http://wjw.beijing.gov.cn/>.
- [14] L. Min, “Modelling, simulations and analysis of the first and second COVID-19 epidemic in Beijing,” 2021., medRxiv preprint doi: <https://doi.org/10.1101/2021.07.04.21259205>.
